# Supplementary material for: Tuberculosis knowledge and attitude among non-health science university students needs attention: a cross-sectional study in three Ethiopian universities
Source: Springer Nature journal article supplement (doi:10.1186/s12889-020-08788-1), 2020-05-06
Supplement: MOESM1 [file 17959286]

Table 2 Tuberculosis knowledge about cause, transmission, treatment and prevention among non-health science university students, eastern Ethiopia

| Variables                  | Frequency<br>n (%) |
|----------------------------|--------------------|
| <b>Is TB communicable</b>  |                    |
| No                         | 70 (4.1)           |
| Yes                        | 1390 (80.8)        |
| No idea                    | 260 (15.1)         |
| <b>Disease seriousness</b> |                    |
| Very serious               | 1100 (64.0)        |
| Somewhat serious           | 370 (21.5)         |
| Not serious                | 148 (8.6)          |
| No Idea                    | 102 (5.9)          |
| <b>Causes</b>              |                    |
| Don't know                 | 104 (6.0)          |
| Bad luck/curse             | 88 (5.1)           |
| Cold wind                  | 481 (28.0)         |
| Smoking                    | 192 (11.2)         |
| Viruses                    | 214 (12.4)         |
| Bacteria                   | 555 (32.3)         |
| Others*                    | 86 (5.0)           |
| <b>Transmission mode</b>   |                    |
| Don't know                 | 81 (4.7)           |

|                                                                                |             |
|--------------------------------------------------------------------------------|-------------|
| Through the air when the infected Person coughs or sneezes                     | 1439 (83.7) |
| Through eating from the same plate                                             | 83 (4.8)    |
| Through touching items in public places (doorknobs, handles in transportation) | 105 (6.1)   |
| Through handshakes                                                             | 12 (.7)     |
| <b>Can TB be cured?</b>                                                        |             |
| No                                                                             | 15 (.9)     |
| Yes, Completely                                                                | 1312 (76.3) |
| Yes, Partially                                                                 | 267 (15.5)  |
| No idea                                                                        | 126 (7.3)   |
| <b>The best means of treatment</b>                                             |             |
| Don't Know                                                                     | 56 (3.3)    |
| Herbal Remedies                                                                | 67 (3.9)    |
| Homemade Remedies                                                              | 68 (4.0)    |
| Prayer                                                                         | 87 (5.1)    |
| Holy water                                                                     | 28 (1.6)    |
| Modern medicine                                                                | 1414 (82.2) |
| <b>Know about DOTS program<sup>y</sup></b>                                     |             |
| No                                                                             | 831 (48.3)  |
| Yes                                                                            | 583 (33.9)  |
| <b>Risks if treatment is not taken</b>                                         |             |
| Don't know                                                                     | 197 (11.5)  |
| Infect others                                                                  | 542 (31.5)  |

|                                |            |
|--------------------------------|------------|
| Loss weight                    | 155 (9.0)  |
| Develops severe health problem | 224 (13.0) |
| No effect                      | 47 (2.7)   |
| Death                          | 555 (32.3) |

**Risks if treatment is not completed**

|                             |            |
|-----------------------------|------------|
| Don't know                  | 282 (16.4) |
| Drug resistance             | 163 (9.5)  |
| Relapse                     | 115 (6.7)  |
| Inability to cure infection | 504 (29.3) |
| No effect                   | 17 (1.0)   |
| Death                       | 639 (37.2) |

**Means of prevention**

|                                                          |             |
|----------------------------------------------------------|-------------|
| Do not know                                              | 121 (7.0)   |
| Covering mouth and nose when coughing or sneezing        | 1008 (58.6) |
| Avoid sharing dishes                                     | 107 (6.2)   |
| Washing hands after touching items in public places      | 61 (3.5)    |
| Closing windows at home                                  | 98 (5.7)    |
| Closing windows during public transportation (bus, taxi) | 78 (4.5)    |
| By vaccination                                           | 115 (6.7)   |
| By isolating TB patients                                 | 78 (4.5)    |
| Others                                                   | 54 (3.1)    |

**Know about anti-TB vaccine**

|    |            |
|----|------------|
| No | 391 (22.7) |
|----|------------|

|         |            |
|---------|------------|
| Yes     | 993 (57.7) |
| No idea | 336 (19.5) |

**Heard of MDR-TB**

|     |            |
|-----|------------|
| No  | 884 (51.4) |
| Yes | 836 (48.6) |

**Heard of Latent TB**

|     |             |
|-----|-------------|
| No  | 1540 (89.5) |
| Yes | 180 (10.5)  |

\*Others: Demon, Spoiled soil, Malnutrition, poor hygiene; †total is: All students

DOTS: Directly Observed Treatment Short Course program
