# Supplementary material for: Tuberculosis knowledge and attitude among non-health science university students needs attention: a cross-sectional study in three Ethiopian universities
Source: Springer Nature journal article supplement (doi:10.1186/s12889-020-08788-1), 2020-05-06
Supplement: MOESM2 [file 17959286]

Table 4 Attitude towards tuberculosis patients among non-health science university students, eastern Ethiopia

| Variables                                                                               | Frequency<br>n (%) |
|-----------------------------------------------------------------------------------------|--------------------|
| <b>How TB cases are regarded in his/her community</b>                                   |                    |
| Not sure what to say                                                                    | 256 (14.9)         |
| No reaction                                                                             | 217 (12.6)         |
| Most people reject him/her                                                              | 138 (8.0)          |
| Most people are friendly, but they generally try to avoid him/her                       | 628 (36.5)         |
| The community mostly supports and helps him/her                                         | 481 (28.0)         |
| <b>Feeling if he/she is diagnosed with TB</b>                                           |                    |
| Do not know                                                                             | 185 (10.8)         |
| Fear                                                                                    | 294 (17.1)         |
| Shame                                                                                   | 50 (2.9)           |
| Sadness or hopelessness                                                                 | 142 (8.3)          |
| Seek immediate medication                                                               | 1049 (61.0)        |
| <b>Would you hide it if you had TB?</b>                                                 |                    |
| No                                                                                      | 1160 (67.4)        |
| Yes                                                                                     | 344 (20.0)         |
| Do not know                                                                             | 216 (12.6)         |
| <b>Perception about TB affecting his/her social relationship, if he/she is infected</b> |                    |
| No                                                                                      | 868 (50.5)         |

Yes 555 (32.3)

Do not know 297 (17.3)

**What to do if he/she had symptoms of TB**

Do not know 167 (9.7)

Go to the Clinic in this campus 1000 (58.1)

Go to private clinics outside this campus 185 (10.8)

Go to government health facilities outside this campus 225 (13.1)

Others\* 143 (8.3%)

**Perception about the cost of TB treatment in Ethiopia**

Do not know 512 (29.8)

Free of charge 793 (46.1)

Reasonably priced 206 (12.0)

Expensive 209 (12.2)

**Think HIV positive people should be concerned about TB?**

No 380 (22.1)

Yes 1216 (70.7)

Don't know 124 (7.2)

**Feeling about people with TB disease**

No particular feeling 386 (22.4)

Feel compassion and desire to help 739 (43.0)

Feel compassion, but tend to stay away from these people 382 (22.2)

Fear them because they may infect 213 (12.4)

\*Others include: Go to pharmacy to buy anti TB drugs, pursue other self-treatment options (herbs, etc.); go to traditional healer; go back to parents leaving the University
