# Supplementary material for: Tuberculosis knowledge and attitude among non-health science university students needs attention: a cross-sectional study in three Ethiopian universities
Source: Springer Nature journal article supplement (doi:10.1186/s12889-020-08788-1), 2020-05-06
Supplement: MOESM3 [file 17959286]

Annex . Questionnaire for Knowledge and Attitude on TB among non-health science university students, eastern Ethiopia

Higher Education Institution \_\_\_\_\_ Building No. \_\_\_\_\_

Student name \_\_\_\_\_ Code: \_\_\_\_\_

Student's Mobile Phone No. \_\_\_\_\_

| <b>Part-I Socio Demographic Characteristics</b> |                                                                 |                                                       |                       |
|-------------------------------------------------|-----------------------------------------------------------------|-------------------------------------------------------|-----------------------|
| <b>S No.</b>                                    | <b>Questions to be asked</b>                                    | <b>Proposed response/s</b>                            | <b>Coded response</b> |
| 01                                              | Gender                                                          | 1. Male                                               | 0                     |
|                                                 |                                                                 | 2. Female                                             | 1                     |
| 02                                              | Age in Years                                                    | _____                                                 |                       |
| 03                                              | Address before joining higher education Institution (by region) | 1. Tigray region                                      | 0                     |
|                                                 |                                                                 | 2. Afar region                                        | 1                     |
|                                                 |                                                                 | 3. Amhara region                                      | 2                     |
|                                                 |                                                                 | 4. Oromia region                                      | 3                     |
|                                                 |                                                                 | 5. Somali region                                      | 4                     |
|                                                 |                                                                 | 6. Benishangul-Gumuz region                           | 5                     |
|                                                 |                                                                 | 7. Gambela region                                     | 6                     |
|                                                 |                                                                 | 8. Harari region                                      | 7                     |
|                                                 |                                                                 | 9. Southern Nations, Nationalities, & peoples' region | 8                     |
|                                                 |                                                                 | 10. Addis Ababa City Administration                   | 9                     |
|                                                 |                                                                 | 11. Dire Dawa City Administration                     | 10                    |
|                                                 |                                                                 | 12. Others                                            | 11                    |
| 04                                              | Residence before joining higher education Institution           | 1. Urban                                              | 0                     |
|                                                 |                                                                 | 2. Rural                                              | 1                     |
| 05                                              | Year of student in the University                               | 1. Year-1                                             | 0                     |
|                                                 |                                                                 | 2. Year-2                                             | 1                     |
|                                                 |                                                                 | 3. Year-3                                             | 2                     |
|                                                 |                                                                 | 4. Year-4                                             | 3                     |
|                                                 |                                                                 | 5. Year-5                                             | 4                     |
|                                                 |                                                                 | 6. Year-6                                             | 5                     |
|                                                 |                                                                 | 7. Above Year-6                                       | 6                     |
| 06                                              | Religion                                                        | 1. Orthodox                                           | 0                     |
|                                                 |                                                                 | 2. Muslim                                             | 1                     |
|                                                 |                                                                 | 3. Protestant                                         | 2                     |
|                                                 |                                                                 | 4. Catholic                                           | 3                     |
|                                                 |                                                                 | 5. Others/Specify _____                               | 4                     |
| <b>Part-II TB Knowledge and awareness</b>       |                                                                 |                                                       |                       |
| 07                                              | Have you heard about TB                                         | No                                                    | 0                     |
|                                                 |                                                                 | Yes                                                   | 1                     |
| 08                                              | If Yes, what was your source of information about TB            | Don't know                                            | 0                     |
|                                                 |                                                                 | Radio                                                 | 1                     |
|                                                 |                                                                 | Friends                                               | 2                     |
|                                                 |                                                                 | Primary health care center                            | 3                     |

|    |                                                                             |                                                                                |    |
|----|-----------------------------------------------------------------------------|--------------------------------------------------------------------------------|----|
|    |                                                                             | Family                                                                         | 4  |
|    |                                                                             | Newspaper                                                                      | 5  |
|    |                                                                             | 'Life experience'                                                              | 6  |
|    |                                                                             | Television                                                                     | 7  |
| 09 | Is TB communicable disease?                                                 | No                                                                             | 0  |
|    |                                                                             | Yes                                                                            | 1  |
|    |                                                                             | I have no Idea                                                                 | 2  |
| 10 | In your opinion, how serious disease is TB? (chose only one)                | Very serious                                                                   | 0  |
|    |                                                                             | Somewhat serious                                                               | 1  |
|    |                                                                             | Not very serious                                                               | 2  |
|    |                                                                             | I have no idea                                                                 | 3  |
| 11 | What do you think are causes of TB?                                         | I don't know                                                                   | 0  |
|    |                                                                             | Bad luck/curse                                                                 | 1  |
|    |                                                                             | Poor hygiene                                                                   | 2  |
|    |                                                                             | Demon                                                                          | 3  |
|    |                                                                             | Cold wind                                                                      | 4  |
|    |                                                                             | Spoiled soil (soil with a bad odor)                                            | 5  |
|    |                                                                             | Smoking                                                                        | 6  |
|    |                                                                             | Malnutrition                                                                   | 7  |
|    |                                                                             | Viruses                                                                        | 8  |
|    |                                                                             | Bacteria                                                                       | 9  |
|    |                                                                             | Others (specify) .....                                                         | 10 |
| 12 | What organs of human body can be affected by TB                             | I have no Idea                                                                 | 0  |
|    |                                                                             | Bones                                                                          | 1  |
|    |                                                                             | Kidney                                                                         | 2  |
|    |                                                                             | Uterus                                                                         | 3  |
|    |                                                                             | Abdomen                                                                        | 4  |
|    |                                                                             | Lungs                                                                          | 5  |
|    |                                                                             | Others/Specify                                                                 | 6  |
| 13 | How can a person infected with TB transmit it to another person?            | Don't know                                                                     | 0  |
|    |                                                                             | Through the air when the infected Person coughs or sneezes                     | 1  |
|    |                                                                             | Through eating from the same plate                                             | 2  |
|    |                                                                             | Through touching items in public places (doorknobs, handles in transportation) | 3  |
|    |                                                                             | Through handshakes                                                             | 4  |
|    |                                                                             | Others (specify) -----                                                         | 5  |
| 14 | In your opinion, who can be infected with TB? (Check all that are relevant) | I have no idea                                                                 | 0  |
|    |                                                                             | Only people living with HIV/AIDS                                               | 1  |
|    |                                                                             | Only children                                                                  | 2  |
|    |                                                                             | Only women                                                                     | 3  |
|    |                                                                             | Only old people                                                                | 4  |
|    |                                                                             | Only poor people                                                               | 5  |

|    |                                                                                                               |                                                          |    |
|----|---------------------------------------------------------------------------------------------------------------|----------------------------------------------------------|----|
|    |                                                                                                               | Only homeless people                                     | 6  |
|    |                                                                                                               | Only alcoholics                                          | 7  |
|    |                                                                                                               | Anybody                                                  | 8  |
|    |                                                                                                               | Others/specify                                           | 9  |
| 15 | Which of the following are signs or symptoms of TB affecting the lungs? (Please check all that are mentioned) | Do not know                                              | 0  |
|    |                                                                                                               | Fever                                                    | 1  |
|    |                                                                                                               | Hemoptysis/Coughing up blood                             | 2  |
|    |                                                                                                               | Night sweats                                             | 3  |
|    |                                                                                                               | Loss of appetite                                         | 4  |
|    |                                                                                                               | Chest pain                                               | 5  |
|    |                                                                                                               | Loss of Weight                                           | 6  |
|    |                                                                                                               | General weakness                                         | 7  |
|    |                                                                                                               | Cough>2weeks                                             | 8  |
|    |                                                                                                               | Others/specify                                           | 9  |
| 16 | How can one prevent infection with TB? (Please check all that are mentioned.)                                 | Do not know                                              | 0  |
|    |                                                                                                               | Covering mouth and nose when coughing or sneezing        | 1  |
|    |                                                                                                               | Avoid sharing dishes                                     | 2  |
|    |                                                                                                               | Washing hands after touching items in public places      | 3  |
|    |                                                                                                               | Closing windows at home                                  | 4  |
|    |                                                                                                               | Closing windows during public transportation (bus, taxi) | 5  |
|    |                                                                                                               | Through good nutrition                                   | 6  |
|    |                                                                                                               | By prayer                                                | 7  |
|    |                                                                                                               | By vaccination                                           | 8  |
|    |                                                                                                               | By isolating TB patients                                 | 9  |
|    |                                                                                                               | Avoid shaking hands                                      | 10 |
|    |                                                                                                               | Others (specify)                                         | 11 |
| 17 | Can TB be cured?                                                                                              | No                                                       | 0  |
|    |                                                                                                               | Yes, completely                                          | 1  |
|    |                                                                                                               | Yes, Partially                                           | 2  |
|    |                                                                                                               | I have no idea                                           | 3  |
|    |                                                                                                               | Yes                                                      | 1  |
| 18 | What is the best treatment for someone with TB? (chose only one)                                              | Don't Know                                               | 0  |
|    |                                                                                                               | Herbal Remedies                                          | 1  |
|    |                                                                                                               | Homemade Remedies                                        | 2  |
|    |                                                                                                               | Prayer                                                   | 3  |

|                                                    |                                                                                                                                         |                                                                   |   |
|----------------------------------------------------|-----------------------------------------------------------------------------------------------------------------------------------------|-------------------------------------------------------------------|---|
|                                                    |                                                                                                                                         | Holy water                                                        | 4 |
|                                                    |                                                                                                                                         | Specific drugs given at health facilities/Modern medicine         | 5 |
| 19                                                 | If “modern medicine” for Q no. 18; have you heard about TB-DOTS (Directly Observed Treatment, Short course) program                     | No                                                                | 0 |
|                                                    |                                                                                                                                         | Yes                                                               | 1 |
| 20                                                 | If “modern medicine” for Q no. 18, how long is the TB treatment?                                                                        | I have no idea                                                    | 0 |
|                                                    |                                                                                                                                         | Less than 3 months                                                | 1 |
|                                                    |                                                                                                                                         | 3 months                                                          | 2 |
|                                                    |                                                                                                                                         | 6 months                                                          | 3 |
|                                                    |                                                                                                                                         | 9 months                                                          | 4 |
|                                                    |                                                                                                                                         | 1 year                                                            | 5 |
| 21                                                 | Is there a vaccine for TB?                                                                                                              | No                                                                | 0 |
|                                                    |                                                                                                                                         | Yes                                                               | 1 |
|                                                    |                                                                                                                                         | I have no idea                                                    | 2 |
| 22                                                 | Which of the following are risks if a person with TB does not take treatment? (Please check all that are mentioned)                     | I don't know                                                      | 0 |
|                                                    |                                                                                                                                         | Infects others                                                    | 1 |
|                                                    |                                                                                                                                         | Losses weight                                                     | 2 |
|                                                    |                                                                                                                                         | Develops sever health problems                                    | 3 |
|                                                    |                                                                                                                                         | No effect                                                         | 4 |
|                                                    |                                                                                                                                         | Death                                                             | 5 |
|                                                    |                                                                                                                                         | Others (specify) _____                                            | 6 |
| 23                                                 | Which of the following are risks if a person with TB does not finish a full course of treatment? (Please check all that are mentioned.) | I don't know                                                      | 0 |
|                                                    |                                                                                                                                         | Drug resistance                                                   | 1 |
|                                                    |                                                                                                                                         | Relapse                                                           | 2 |
|                                                    |                                                                                                                                         | Inability to cure infection                                       | 3 |
|                                                    |                                                                                                                                         | No effect                                                         | 4 |
|                                                    |                                                                                                                                         | Death                                                             | 5 |
| 24                                                 | Have you heard about drug resistant TB/ MDR?                                                                                            | No                                                                | 0 |
|                                                    |                                                                                                                                         | Yes                                                               | 1 |
| 25                                                 | If yes, how serious is MDR-TB                                                                                                           | I have no idea                                                    | 0 |
|                                                    |                                                                                                                                         | Not very serious                                                  | 1 |
|                                                    |                                                                                                                                         | Somewhat serious                                                  | 2 |
|                                                    |                                                                                                                                         | Very serious                                                      | 3 |
| 26                                                 | Have you heard of latent TB?                                                                                                            | No                                                                | 0 |
|                                                    |                                                                                                                                         | Yes                                                               | 1 |
| <b>Part-III. Attitude and practices towards TB</b> |                                                                                                                                         |                                                                   |   |
| 27                                                 | In your community, how is a person who has TB usually regarded/treated?                                                                 | Not sure what I would feel                                        | 0 |
|                                                    |                                                                                                                                         | No reaction                                                       | 1 |
|                                                    |                                                                                                                                         | Most people reject him/her                                        | 2 |
|                                                    |                                                                                                                                         | Most people are friendly, but they generally try to avoid him/her | 3 |

|    |                                                                                                                          |                                                                                    |   |
|----|--------------------------------------------------------------------------------------------------------------------------|------------------------------------------------------------------------------------|---|
|    |                                                                                                                          | The community mostly supports and helps him/her                                    | 4 |
|    |                                                                                                                          | Other/specify                                                                      | 5 |
| 28 | Which of the following best describes how you would feel if you were diagnosed with TB? (chose only one)                 | I do not know                                                                      | 0 |
|    |                                                                                                                          | Fear                                                                               | 1 |
|    |                                                                                                                          | Surprise                                                                           | 2 |
|    |                                                                                                                          | Shame                                                                              | 3 |
|    |                                                                                                                          | Sadness or hopelessness                                                            | 4 |
|    |                                                                                                                          | Seek immediate medication                                                          | 5 |
| 29 | If you had TB, would you hide it from others?                                                                            | No                                                                                 | 0 |
|    |                                                                                                                          | Yes                                                                                | 1 |
|    |                                                                                                                          | I do not know                                                                      | 2 |
| 30 | If you had TB, do you think it would affect any of your social relationships?                                            | No                                                                                 | 0 |
|    |                                                                                                                          | Yes                                                                                | 1 |
|    |                                                                                                                          | I do not know                                                                      | 2 |
| 31 | Are you afraid of being infected with TB? (chose only one)                                                               | No                                                                                 | 0 |
|    |                                                                                                                          | Yes                                                                                | 1 |
| 32 | If you or someone living in your dormitory develops TB, do you encourage other students in your dormitory to get tested? | No                                                                                 | 0 |
|    |                                                                                                                          | Yes                                                                                | 1 |
| 33 | What would you do if you thought you had symptoms of TB? (chose only one)                                                | Do not know                                                                        | 0 |
|    |                                                                                                                          | Go to the Clinic in this campus                                                    | 1 |
|    |                                                                                                                          | Go to private clinics outside this campus                                          | 2 |
|    |                                                                                                                          | Go to government health facilities outside this campus                             | 3 |
|    |                                                                                                                          | Go to pharmacy to buy anti TB drugs                                                | 4 |
|    |                                                                                                                          | Go to traditional healer                                                           | 5 |
|    |                                                                                                                          | Pursue other self-treatment options (herbs, etc.)                                  | 6 |
|    |                                                                                                                          | Go back to my parents, leaving the University                                      | 7 |
|    |                                                                                                                          | Others (specify) _____                                                             | 8 |
| 34 | If you would not seek care for TB, what is the reason? (Please check all that apply)                                     | Not sure where to go                                                               | 0 |
|    |                                                                                                                          | Cost                                                                               | 1 |
|    |                                                                                                                          | Difficulties with transportation/distance to health facilities outside this campus | 2 |
|    |                                                                                                                          | Do not trust medical workers in this campus                                        | 3 |
|    |                                                                                                                          | Do not like attitude of medical workers in this campus                             | 4 |
|    |                                                                                                                          | Others (specify) _____                                                             | 5 |
| 35 | If you would not go to a health                                                                                          | When treatment on my own does not work                                             | 0 |

|    |                                                                                                          |                                                                             |   |
|----|----------------------------------------------------------------------------------------------------------|-----------------------------------------------------------------------------|---|
|    | clinic after developing symptoms of TB, at what point would you seek treatment? (chose only one)         | When symptoms that look like TB signs last for 3–4 weeks.                   | 1 |
|    |                                                                                                          | As soon as I realize that my symptoms might be related to TB                | 2 |
|    |                                                                                                          | I would not go to the doctor/I would be cured as TB is self-limited disease | 3 |
| 36 | How would you rate the cost of TB treatment in Ethiopia? (chose only one)                                | Do not know                                                                 | 0 |
|    |                                                                                                          | It is free of charge                                                        | 1 |
|    |                                                                                                          | It is reasonably priced                                                     | 2 |
|    |                                                                                                          | It is somewhat/moderately expensive                                         | 3 |
|    |                                                                                                          | It is very expensive                                                        | 4 |
| 37 | Do you believe the risk of TB is higher at Universities or in the community? (chose only one)            | Do not know                                                                 | 0 |
|    |                                                                                                          | In the University                                                           | 1 |
|    |                                                                                                          | In the community                                                            | 2 |
| 38 | If you think the risk of TB is higher at universities, what is the reason? (Please check all that apply) | Don't know                                                                  | 0 |
|    |                                                                                                          | Inadequate access to food and health services                               | 1 |
|    |                                                                                                          | Overcrowding                                                                | 2 |
|    |                                                                                                          | Poor ventilation                                                            | 3 |
|    |                                                                                                          | Easily acquiring TB infection                                               | 4 |
|    |                                                                                                          | Others (specify) _____                                                      | 5 |
| 39 | Do you think that HIV positive people should be concerned about TB?                                      | No, Why                                                                     | 0 |
|    |                                                                                                          | Yes, Why                                                                    | 1 |
|    |                                                                                                          | Do not know                                                                 | 2 |
| 40 | Which statement is closest to your feeling about people with TB disease?                                 | "I have no particular feeling."                                             | 0 |
|    |                                                                                                          | "I feel compassion and desire to help."                                     | 1 |
|    |                                                                                                          | "I feel compassion, but I tend to stay away from these people."             | 2 |
|    |                                                                                                          | "It is their problem and I cannot get TB."                                  | 3 |
|    |                                                                                                          | "I fear them because they may infect me."                                   | 4 |
|    |                                                                                                          | Other (please explain): _____                                               |   |

Name of Data Collector \_\_\_\_\_ Date \_\_\_\_\_ Sign \_\_\_\_\_

**Thanks for your participation!**
